# Supplementary material for: A New Languidulane Diterpenoid from Salvia mexicana var. mexicana
Source: PubMed Central journal article supplement (PMC6264398; doi:10.3390/molecules16108866), 2011-10-21
Supplement: molecules-16-08866-s001.pdf [file molecules-16-08866-s001.pdf]

## Supporting Information

### Correction of the Structure of Two Languidulane Diterpenoids from *Salvia Mexicana* var. *Mexicana*

Bernardo Antonio Frontana-Uribe, Martha V. Escárcega-Bobadilla, Rosa Estrada-Reyes, José Antonio Morales-Serna, Manuel Salmón, Jorge Cárdenas

Instituto de Química, Universidad Nacional Autónoma de México, Circuito Exterior, Ciudad Universitaria, 04510  
México D. F.

Author to whom correspondence should be addressed; E-Mail: [rjcp@unam.mx](mailto:rjcp@unam.mx); Tel.: +52-55-5622-4413; Fax: +52-55-5616-2217.

- |                              |           |
|------------------------------|-----------|
| 1. NMR Spectra for <b>4a</b> | <b>S1</b> |
| 2. NMR Spectra for <b>4b</b> | <b>S7</b> |

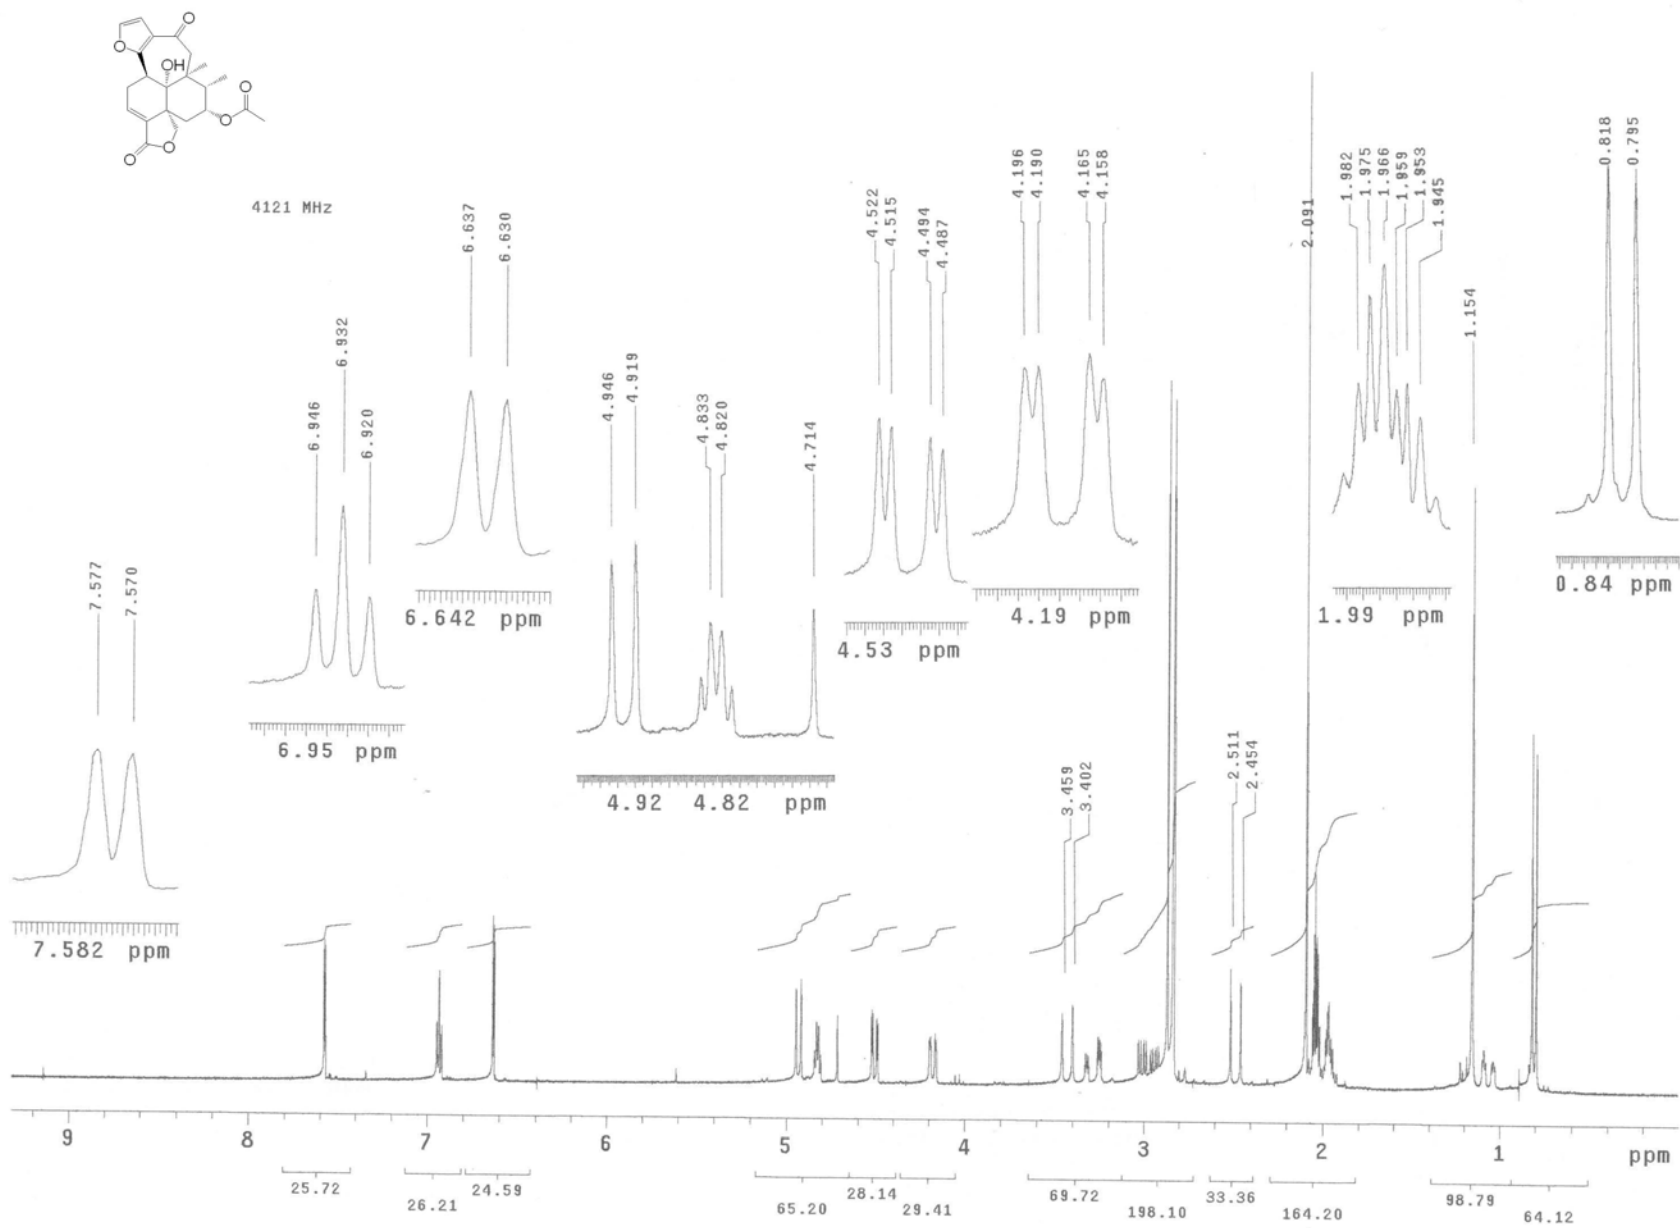

Figure S1.  $^1\text{H}$  NMR of **4a** (acetone- $d_6$ )

U.N.A.M. Instituto de Química

300 MHz

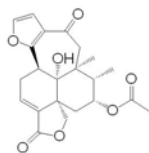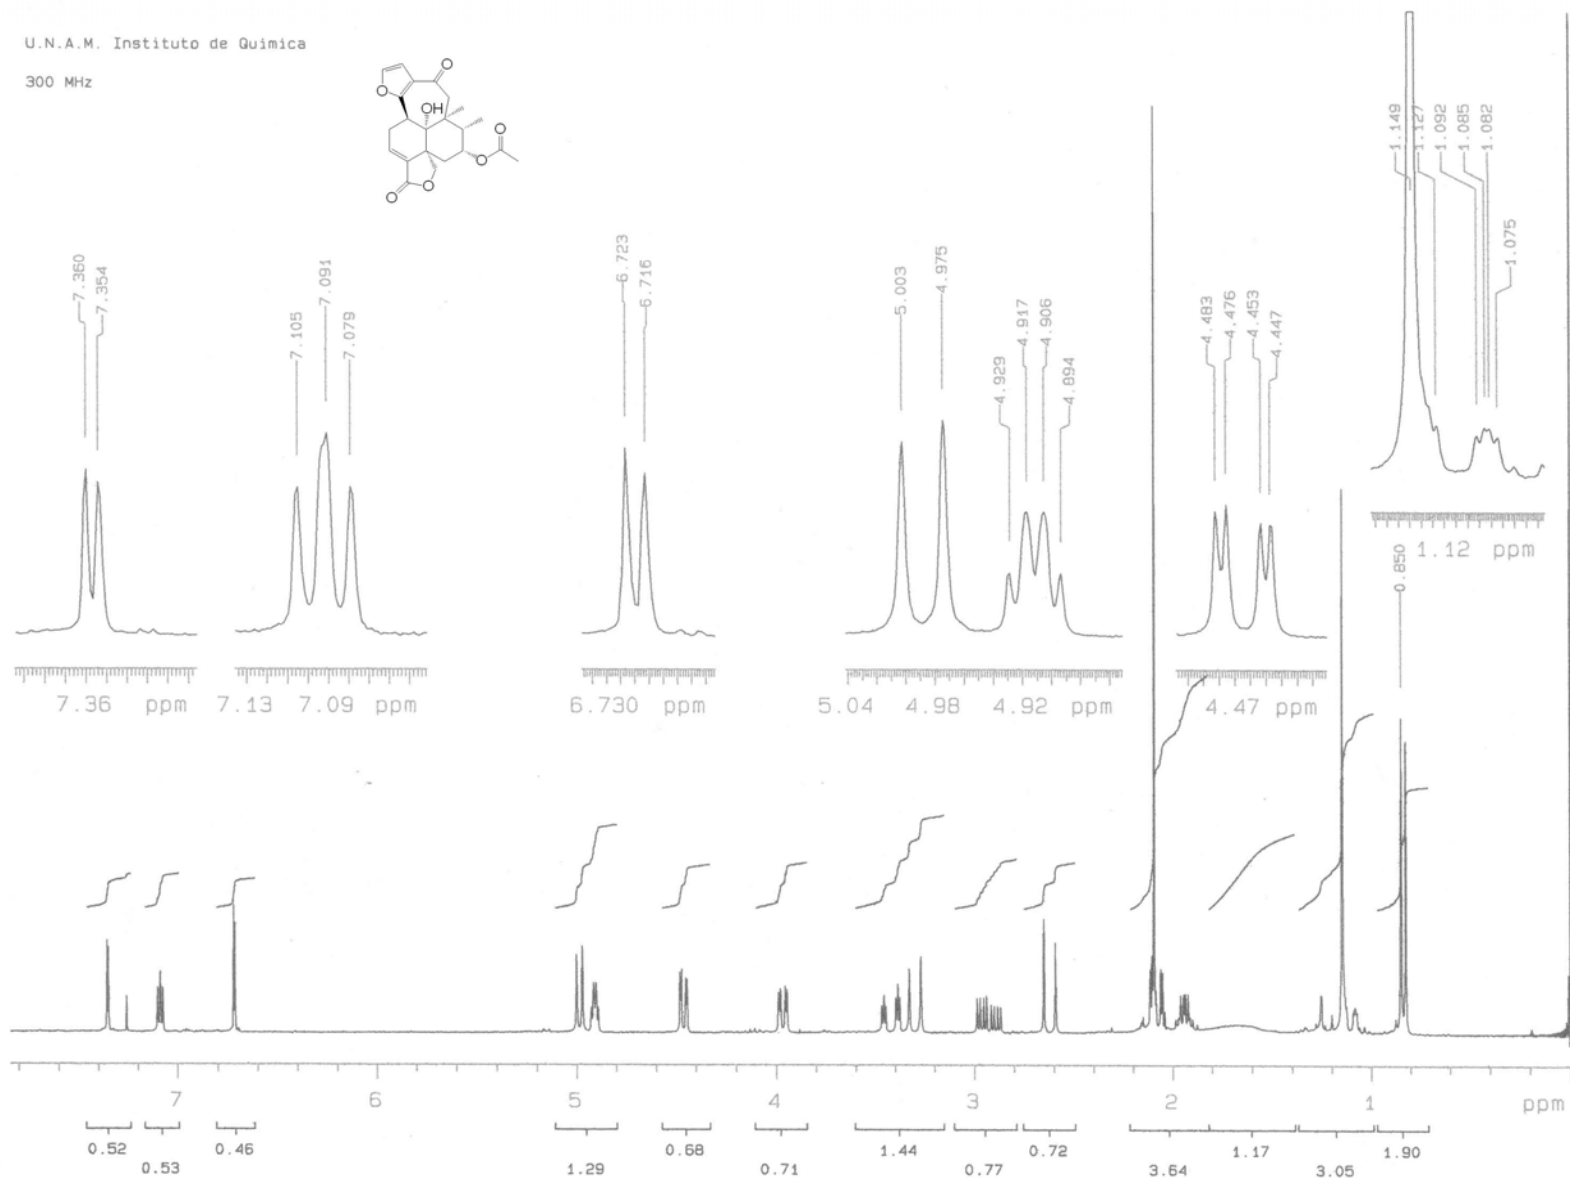

Figure S2.  $^1\text{H}$  NMR of **4a** ( $\text{CDCl}_3$ )

U.N.A.M. Instituto de Química

300 MHz

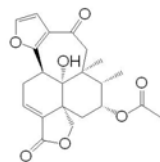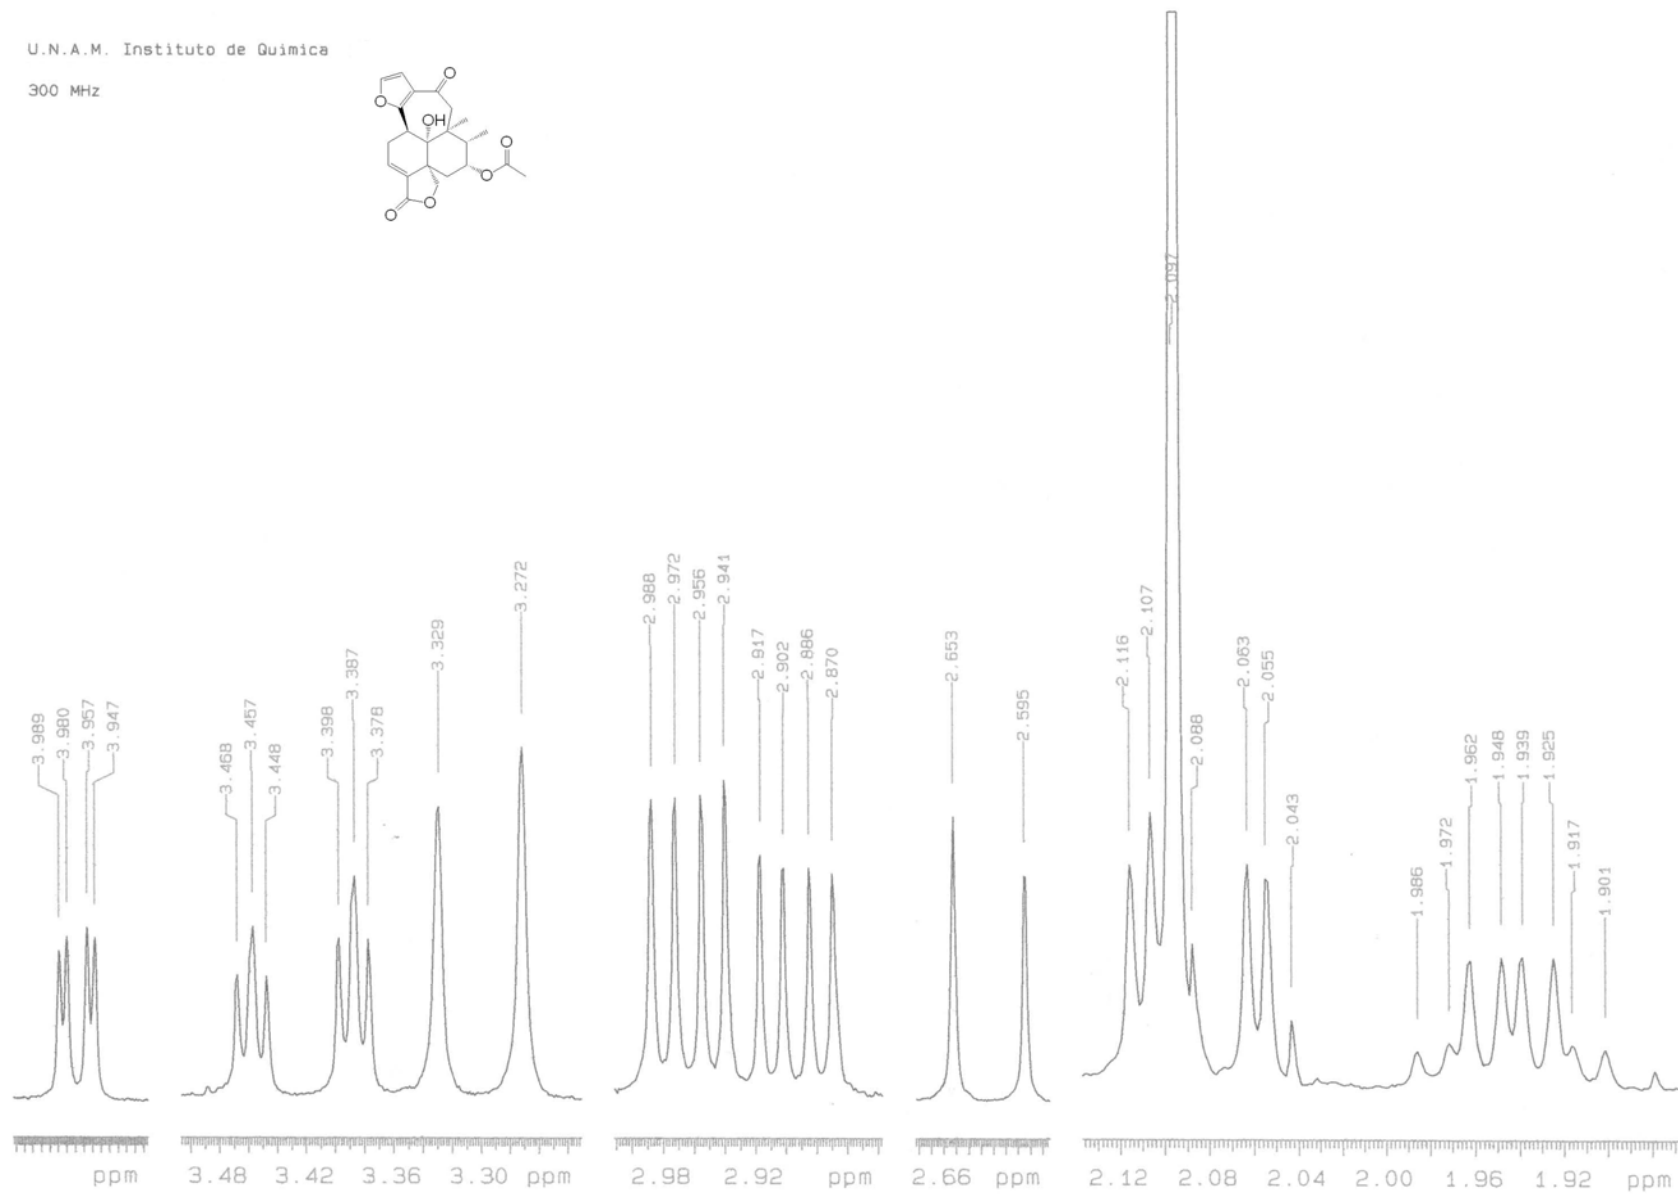

Figure S3.  $^1\text{H}$  NMR of **4a** ( $\text{CDCl}_3$ )

Solvent: cdc13  
 Ambient temperature  
 UNITY-300 "rmng"  
 PULSE SEQUENCE  
 Relax. delay 0.600 sec  
 Pulse 21.5 degrees  
 Acq. time 0.400 sec  
 Width 18797.0 Hz  
 49920 repetitions  
 OBSERVE C13, 75.4216944 MHz  
 DECOUPLE H1, 299.9479281 MHz  
 Power 38 dB  
 continuously on  
 WALTZ-16 modulated  
 Single precision data  
 DATA PROCESSING  
 Line broadening 0.0 Hz  
 FT size 32768  
 Total time 13.9 hours

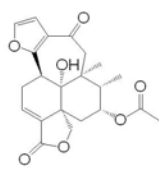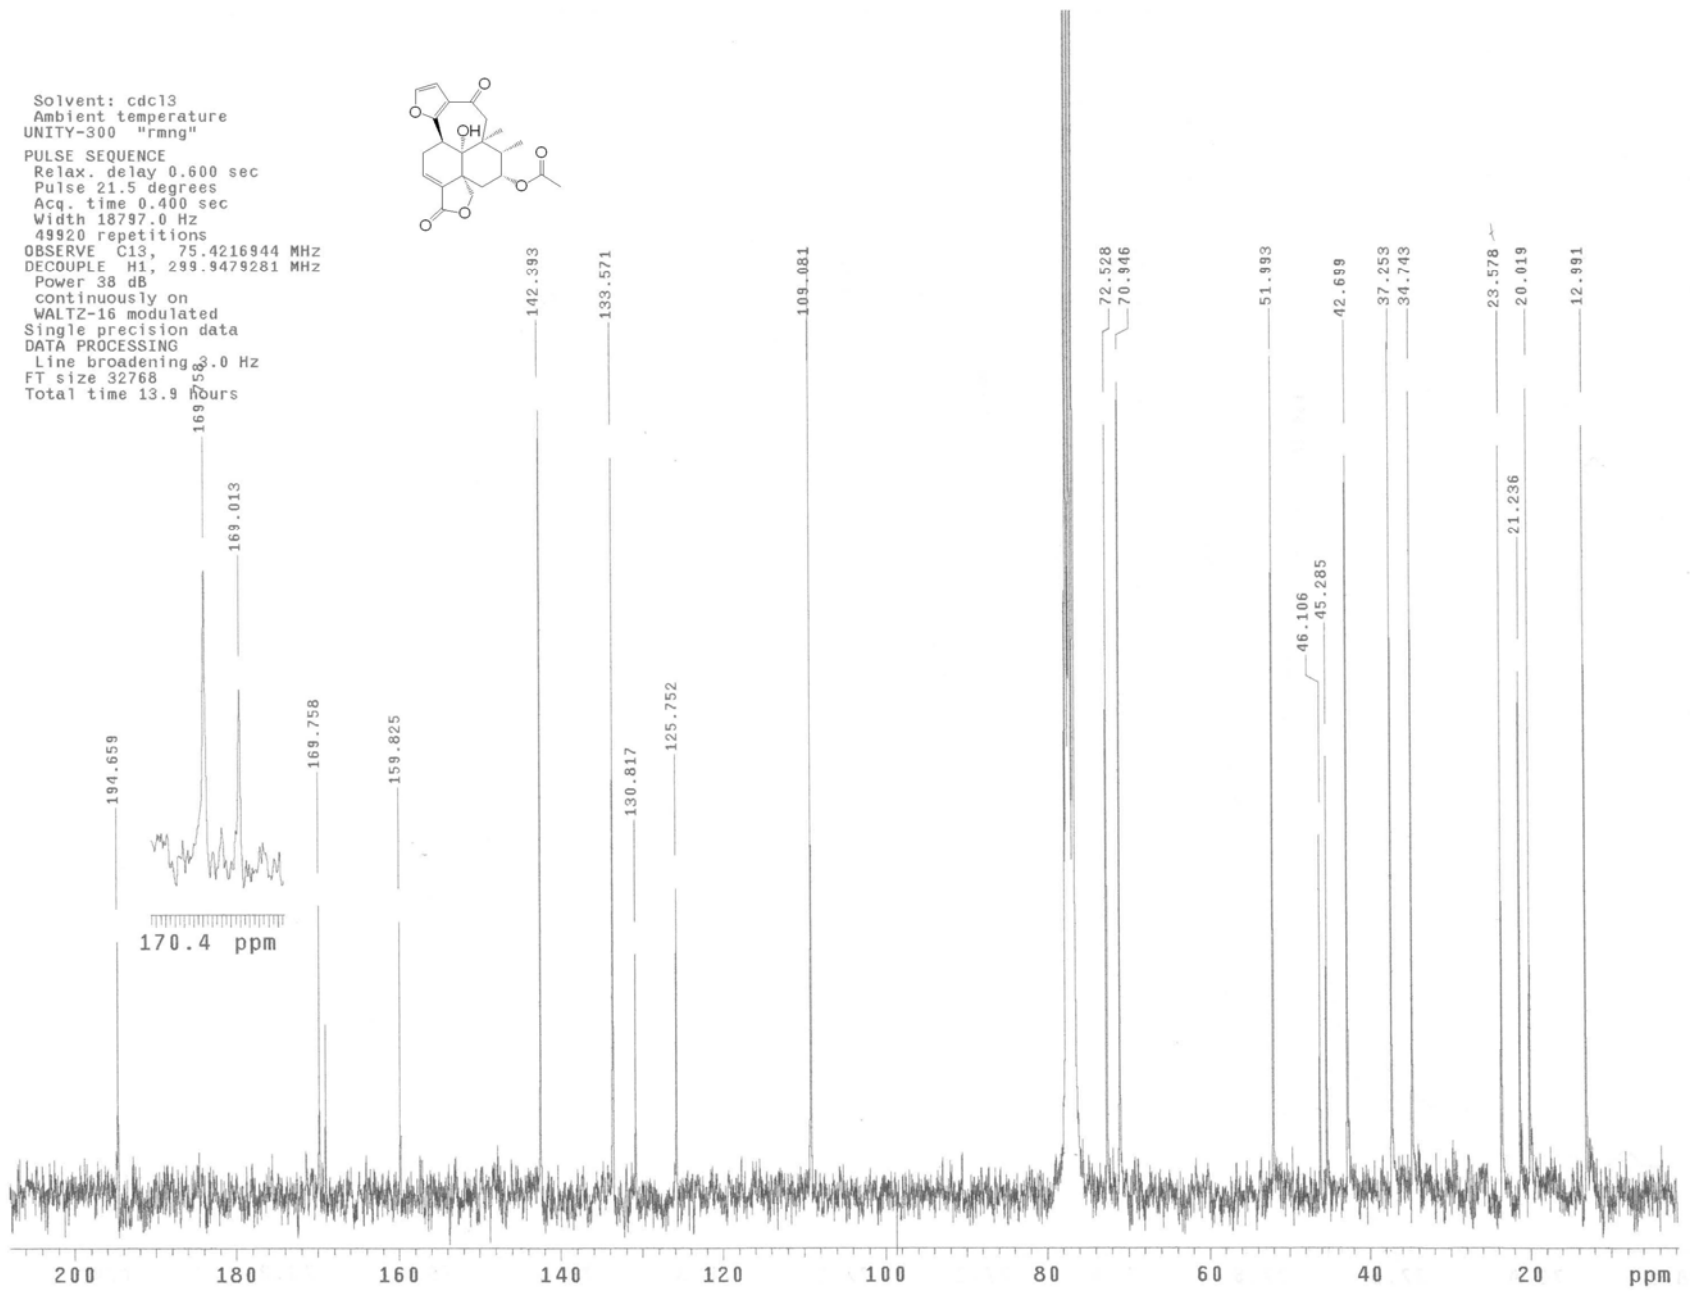

Figure S4. <sup>13</sup>C NMR of 4a (CDCl<sub>3</sub>)

Solvent: cdc13  
Ambient temperature  
UNITY-300 "rmng"  
PULSE SEQUENCE: dept  
Relax. delay 2.000 sec  
Pulse 60.2 degrees  
Acq. time 0.400 sec  
Width 18001.8 Hz  
6000 repetitions  
OBSERVE C13, 75.4216991 MHz  
DECOUPLE H1, 299.9485781 MHz  
Power 38 dB  
on during acquisition  
off during delay  
WALTZ-16 modulated  
Single precision data  
DATA PROCESSING  
Line broadening 3.0 Hz  
FT size 32768  
Total time 8.0 hours

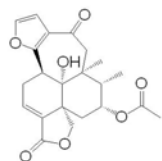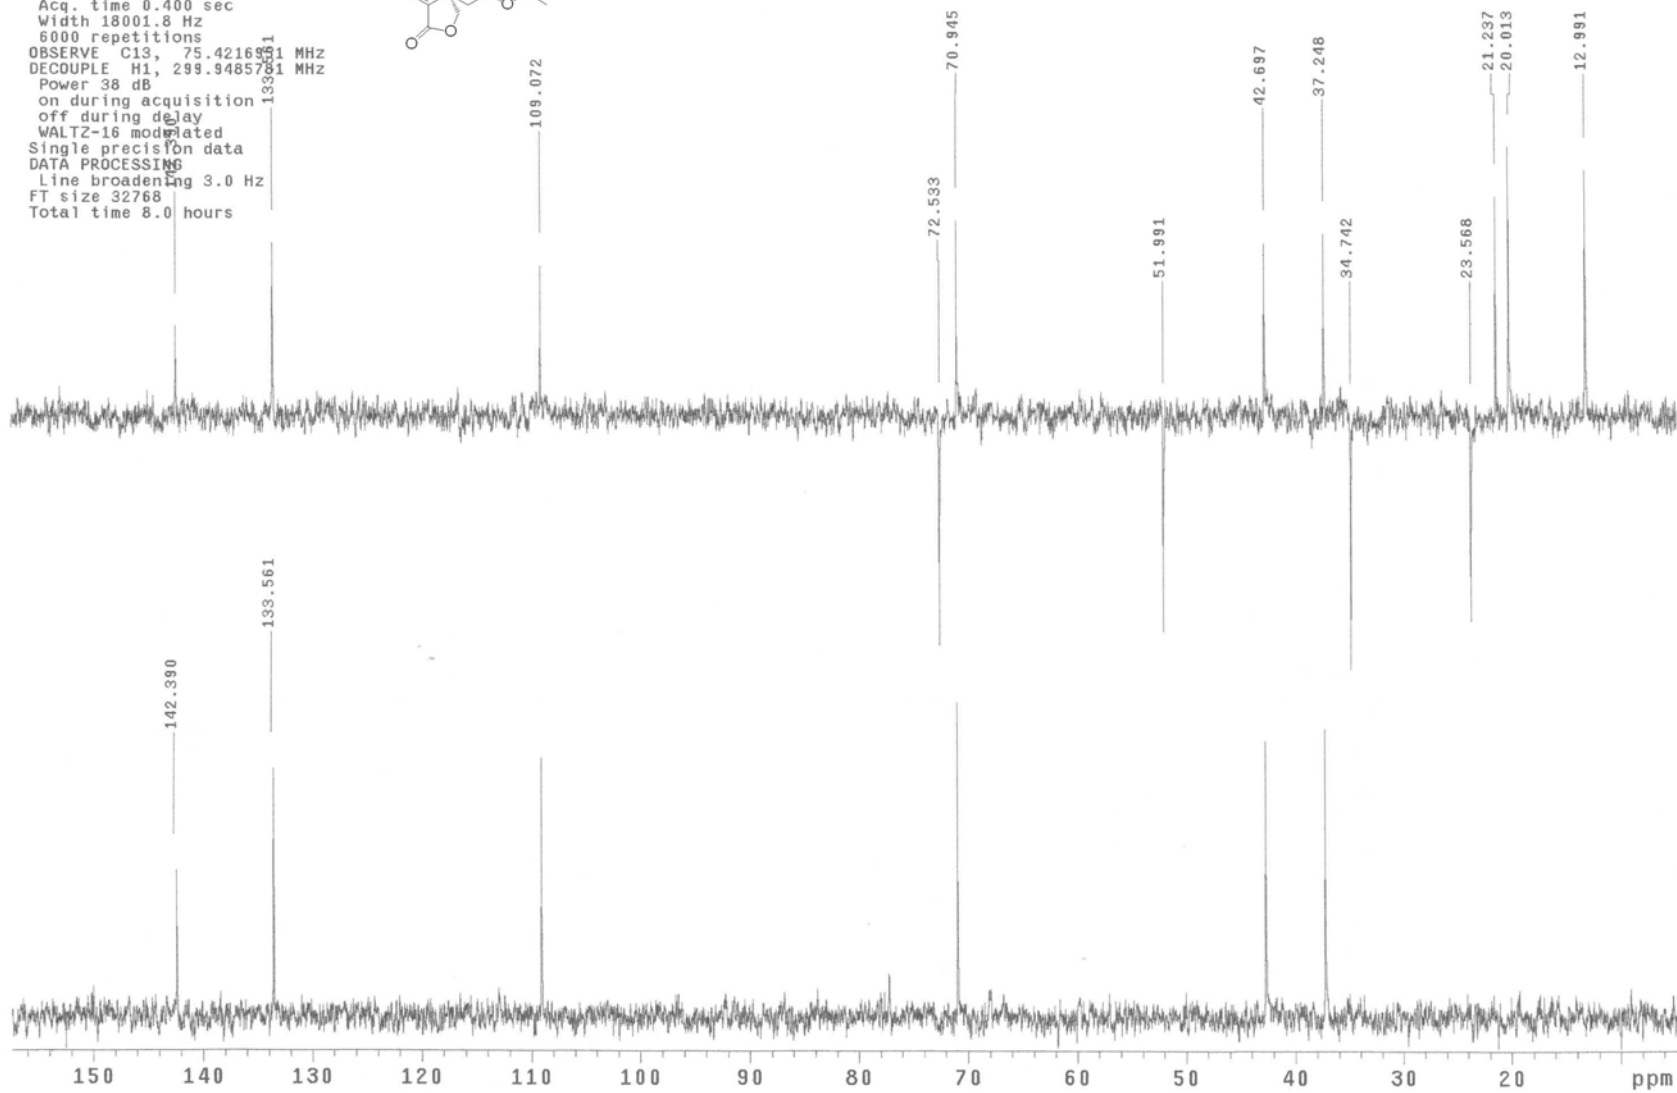

Figure S5.  $^{13}\text{C}$  NMR DEPT of **4a** ( $\text{CDCl}_3$ )

U.N.A.M. Instituto de Quimica

300 MHz  
noesy

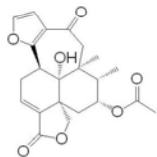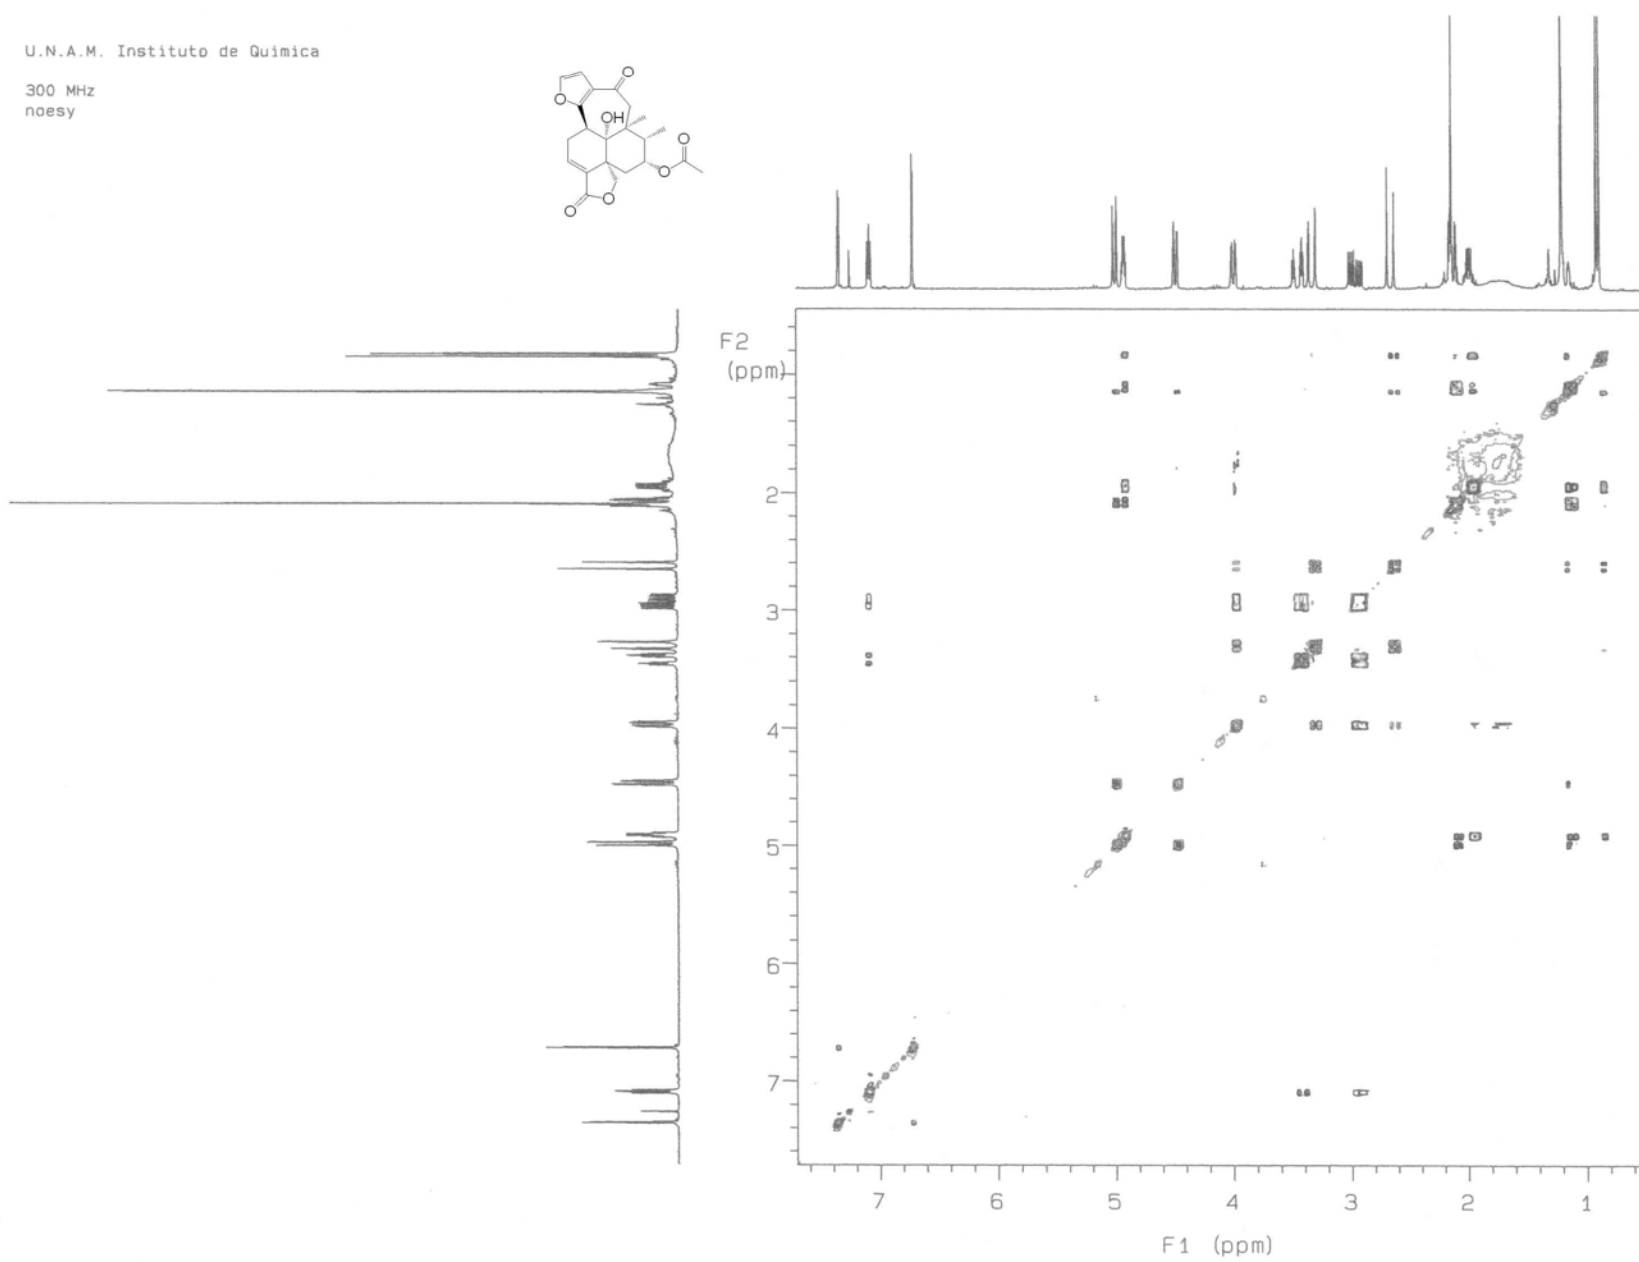

**Figure S6.**  $^1\text{H}$  NMR COSY of **4a** ( $\text{CDCl}_3$ )

U.N.A.M. Instituto de Química  
BF16  
300 MHz

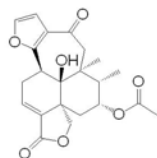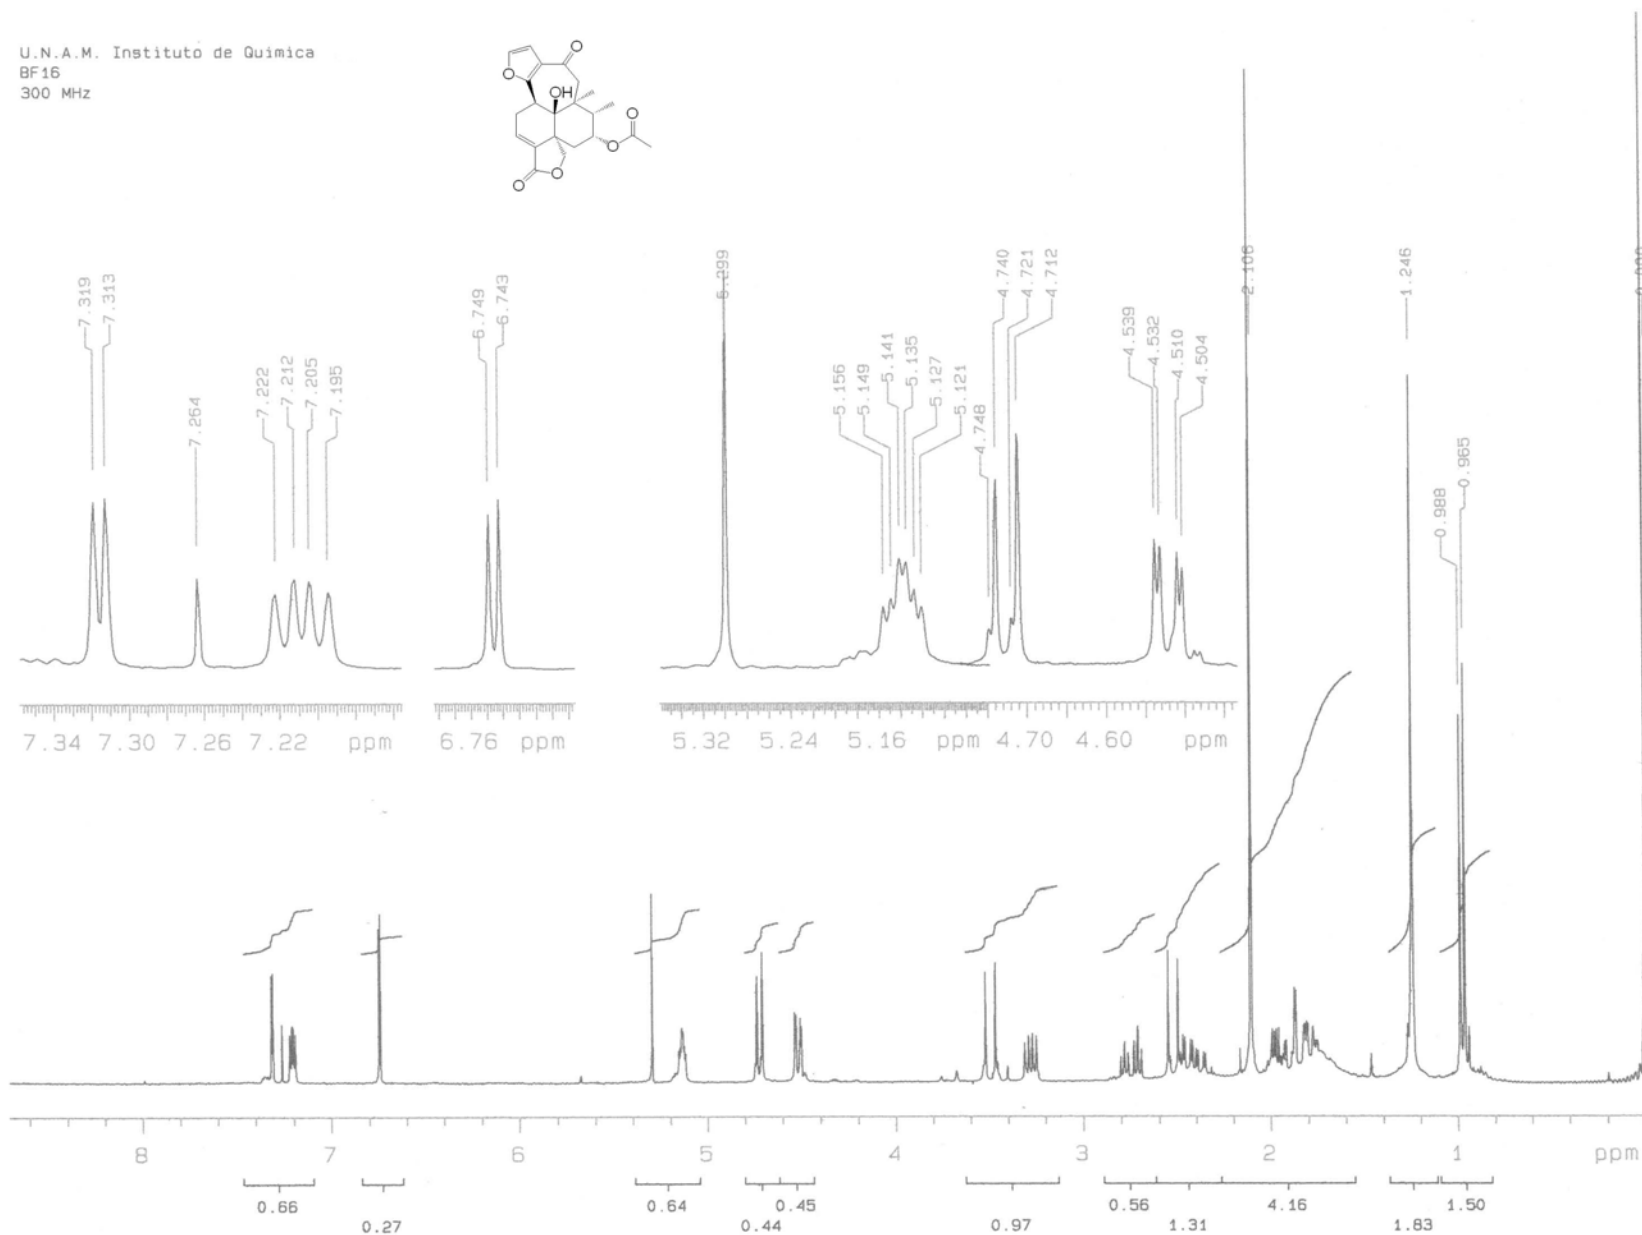

Figure S7.  $^1\text{H}$  NMR of **4b** ( $\text{CDCl}_3$ )



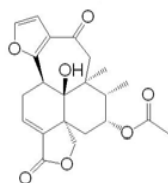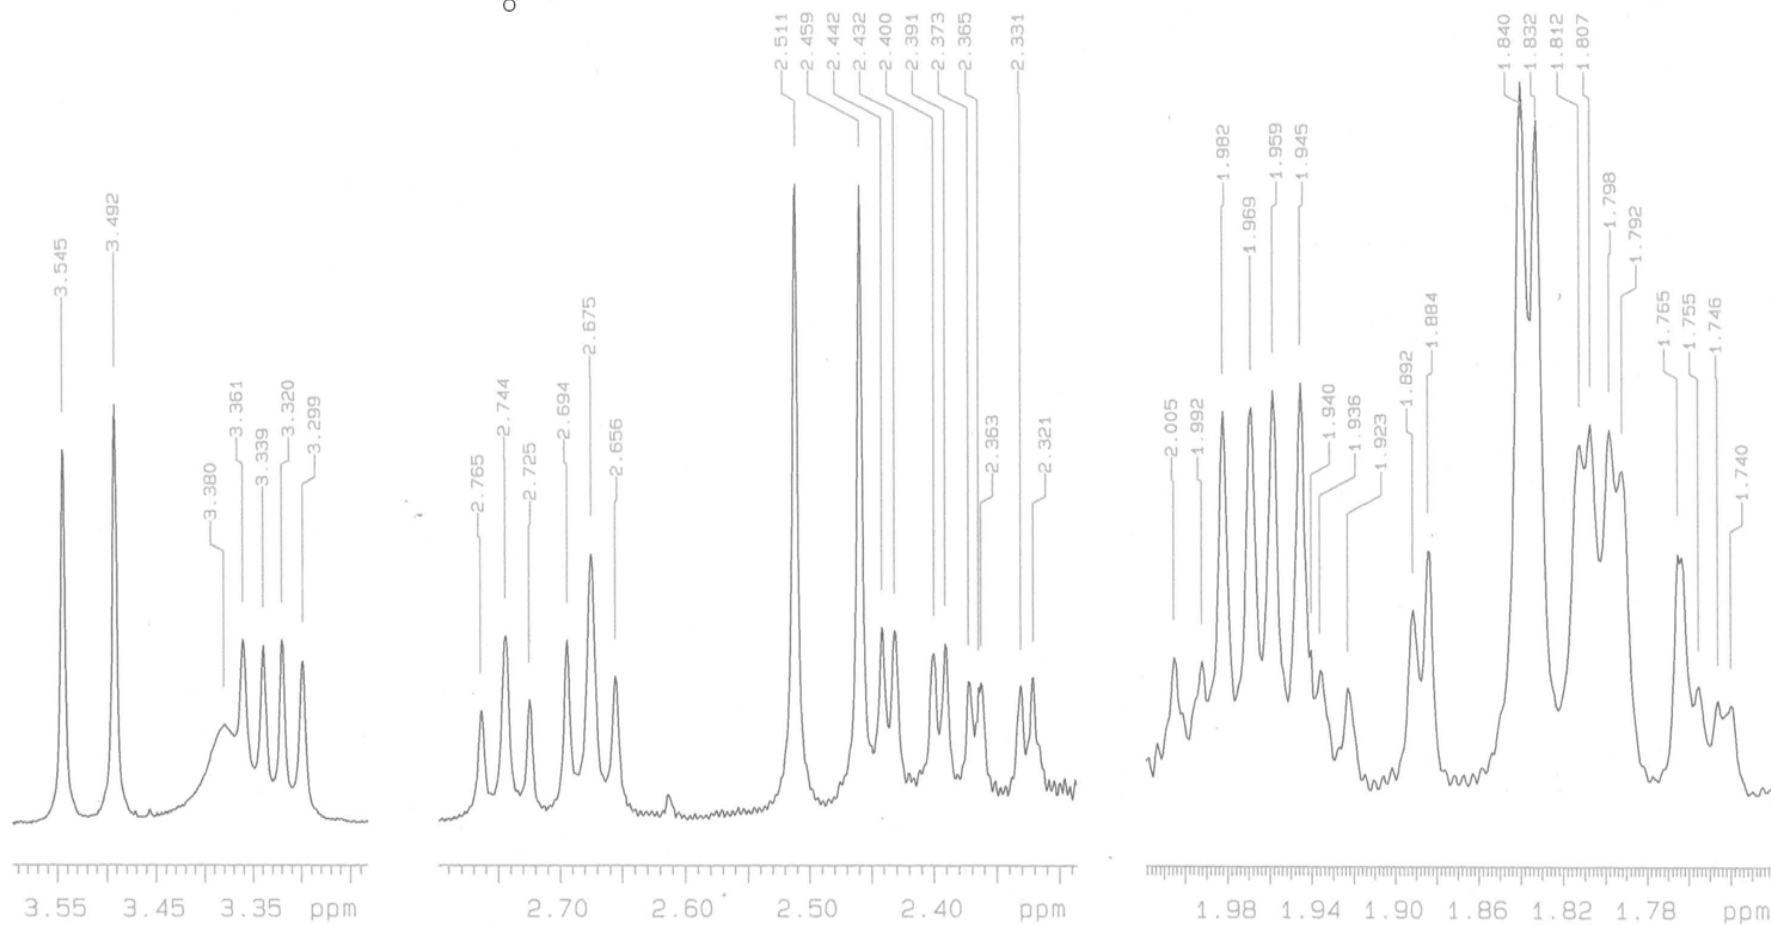

Figure S8.  $^1\text{H}$  NMR of **4b** ( $\text{CDCl}_3$ )

U.N.A.M. Instituto de Quimica

BF16

75 MHz

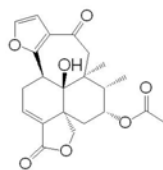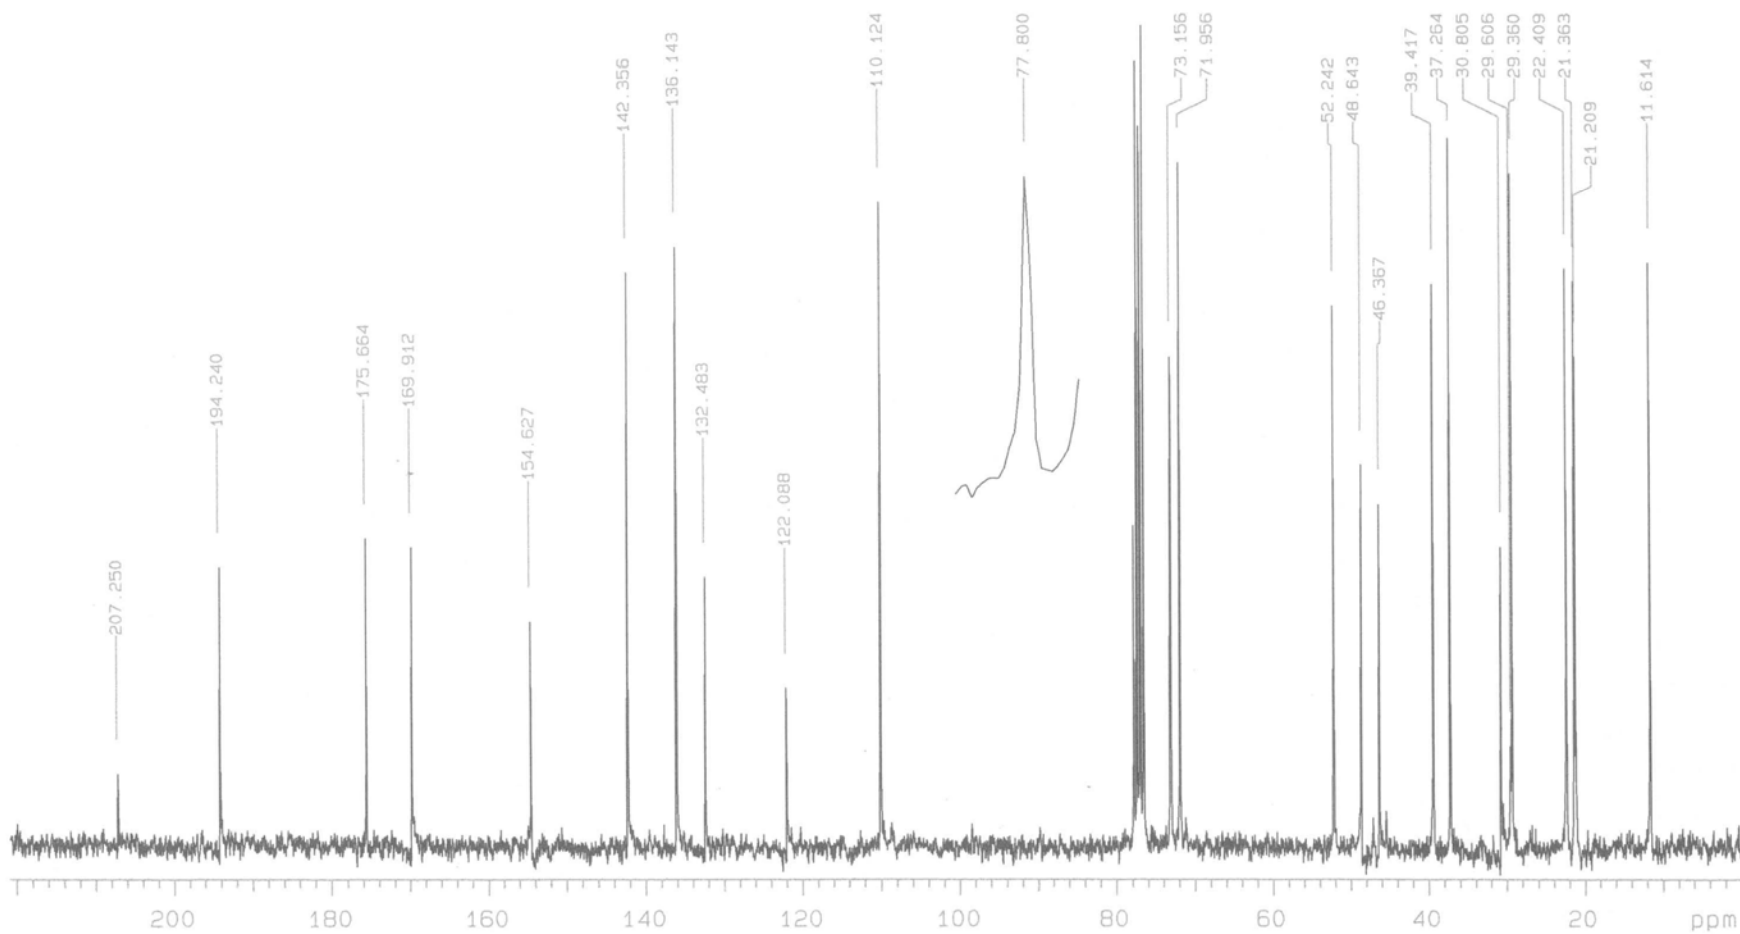

Figure S9. <sup>13</sup>C NMR of **4b** (CDCl<sub>3</sub>)

U.N.A.M. Instituto de Química

BF16

75 MHz

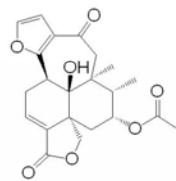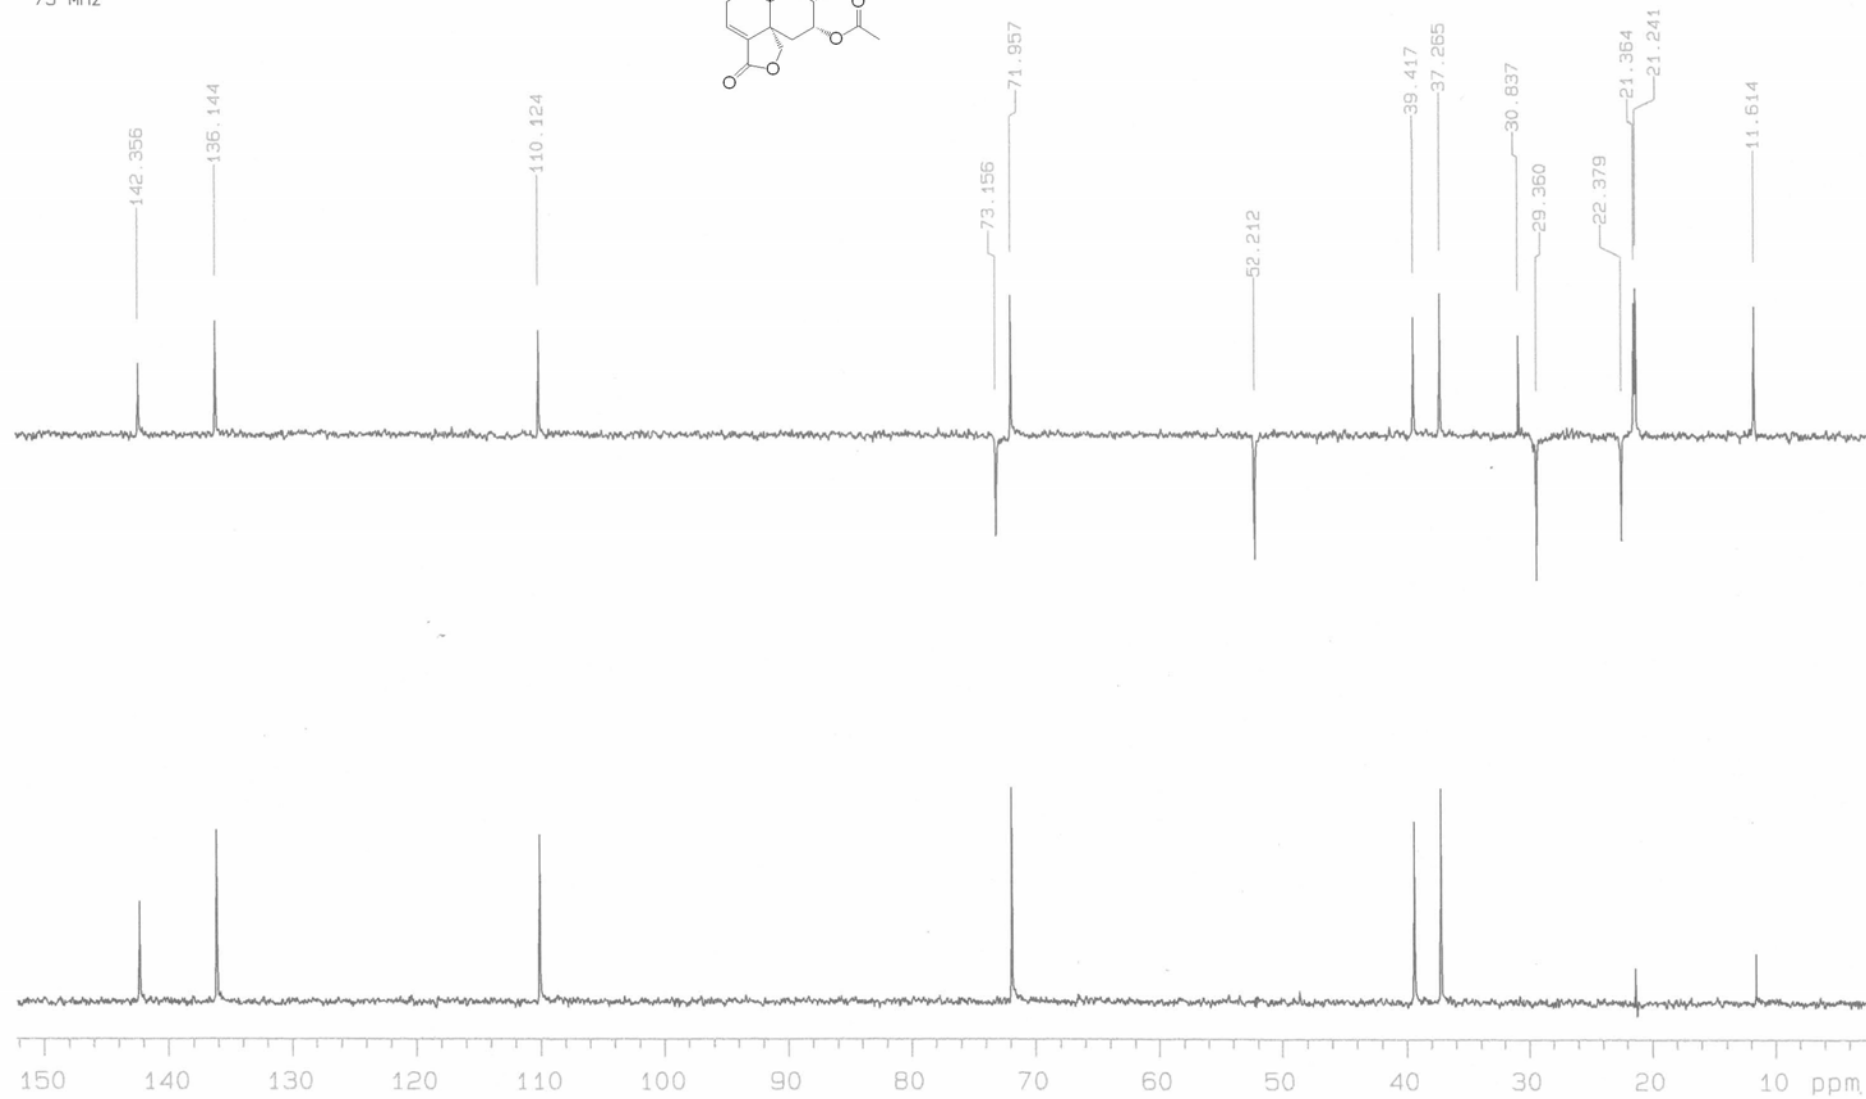

Figure S10.  $^{13}\text{C}$  NMR DEPT of **4b** ( $\text{CDCl}_3$ )

U.N.A.M. Instituto de Quimica

BF16

300 MHz  
COSY

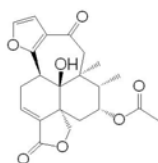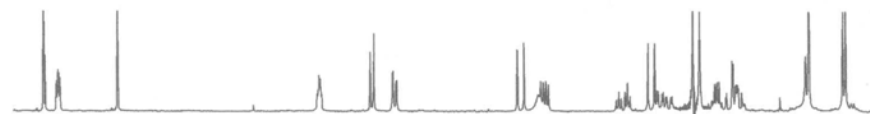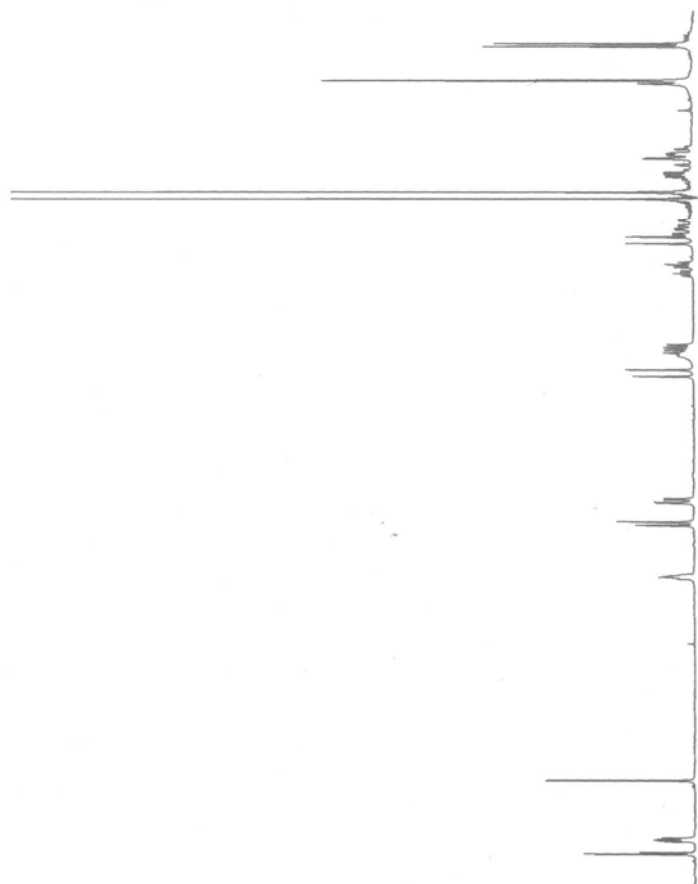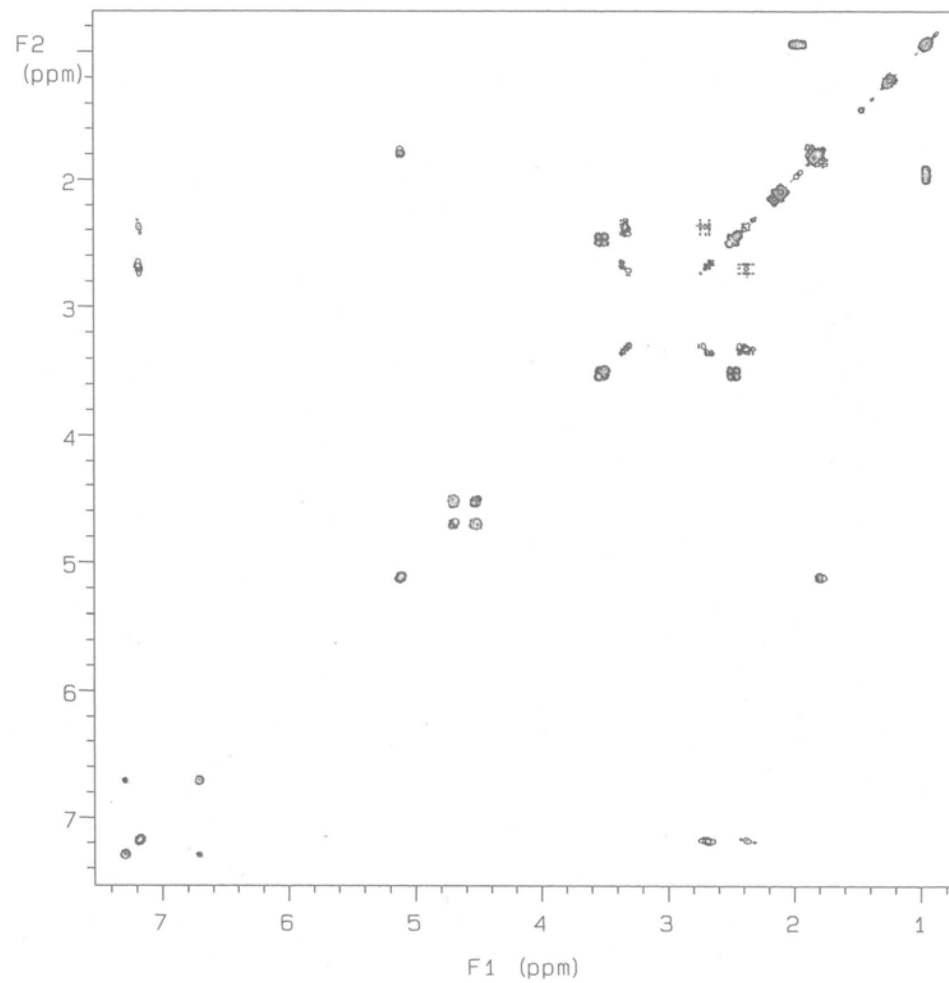

**Figure S11.**  $^1\text{H}$  NMR COSY of **4b** ( $\text{CDCl}_3$ )

U.N.A.M. Instituto de Quimica

BF16

75 MHz  
HETCOR

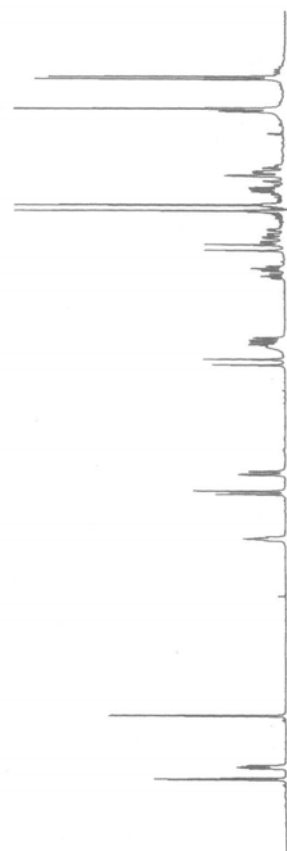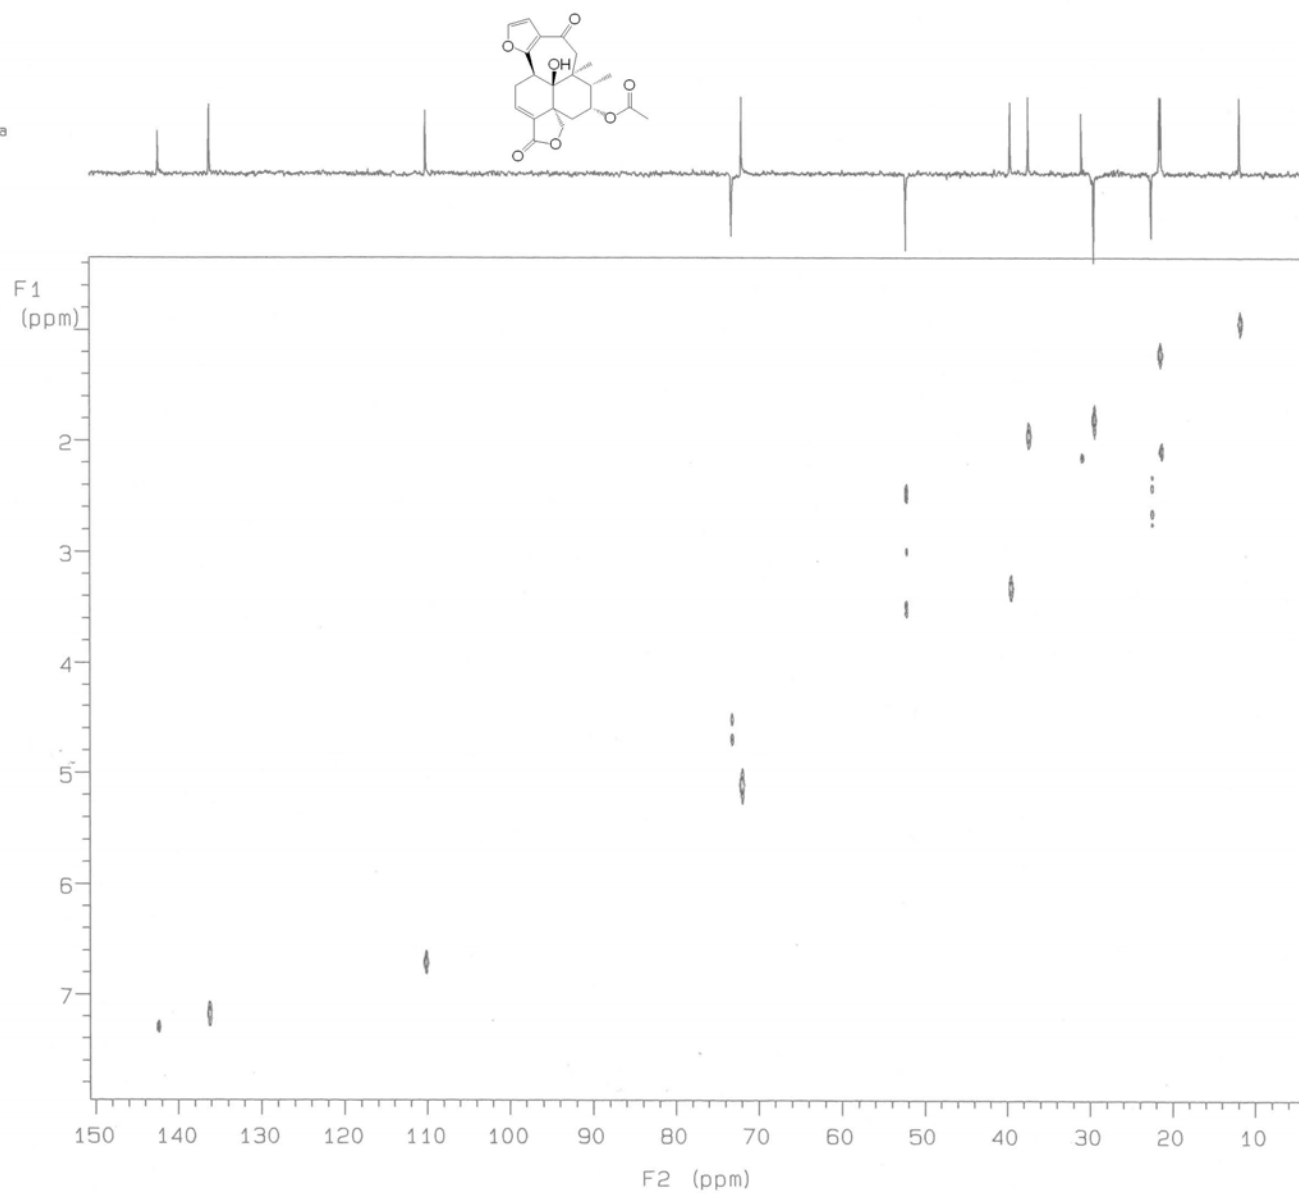

**Figure S12.** NMR HETCOR of **4a** (CDCl<sub>3</sub>)

U.N.A.M. Instituto de Quimica

BF16

75 MHz  
FLOCK

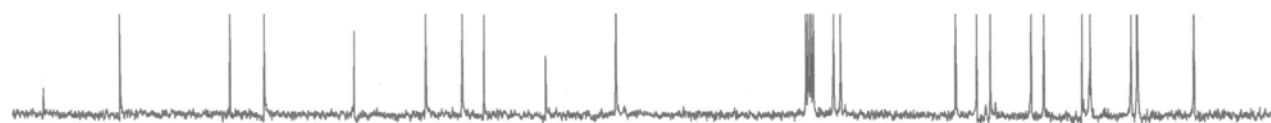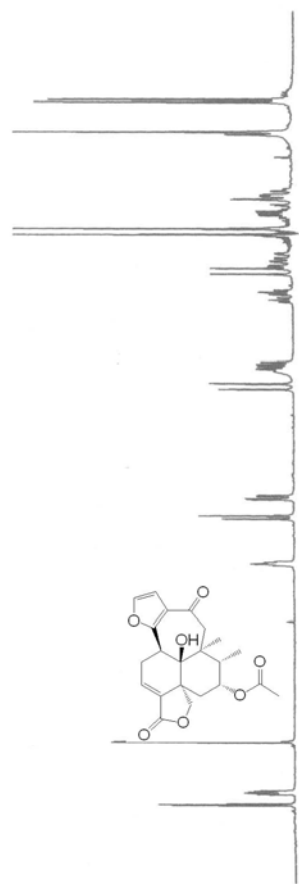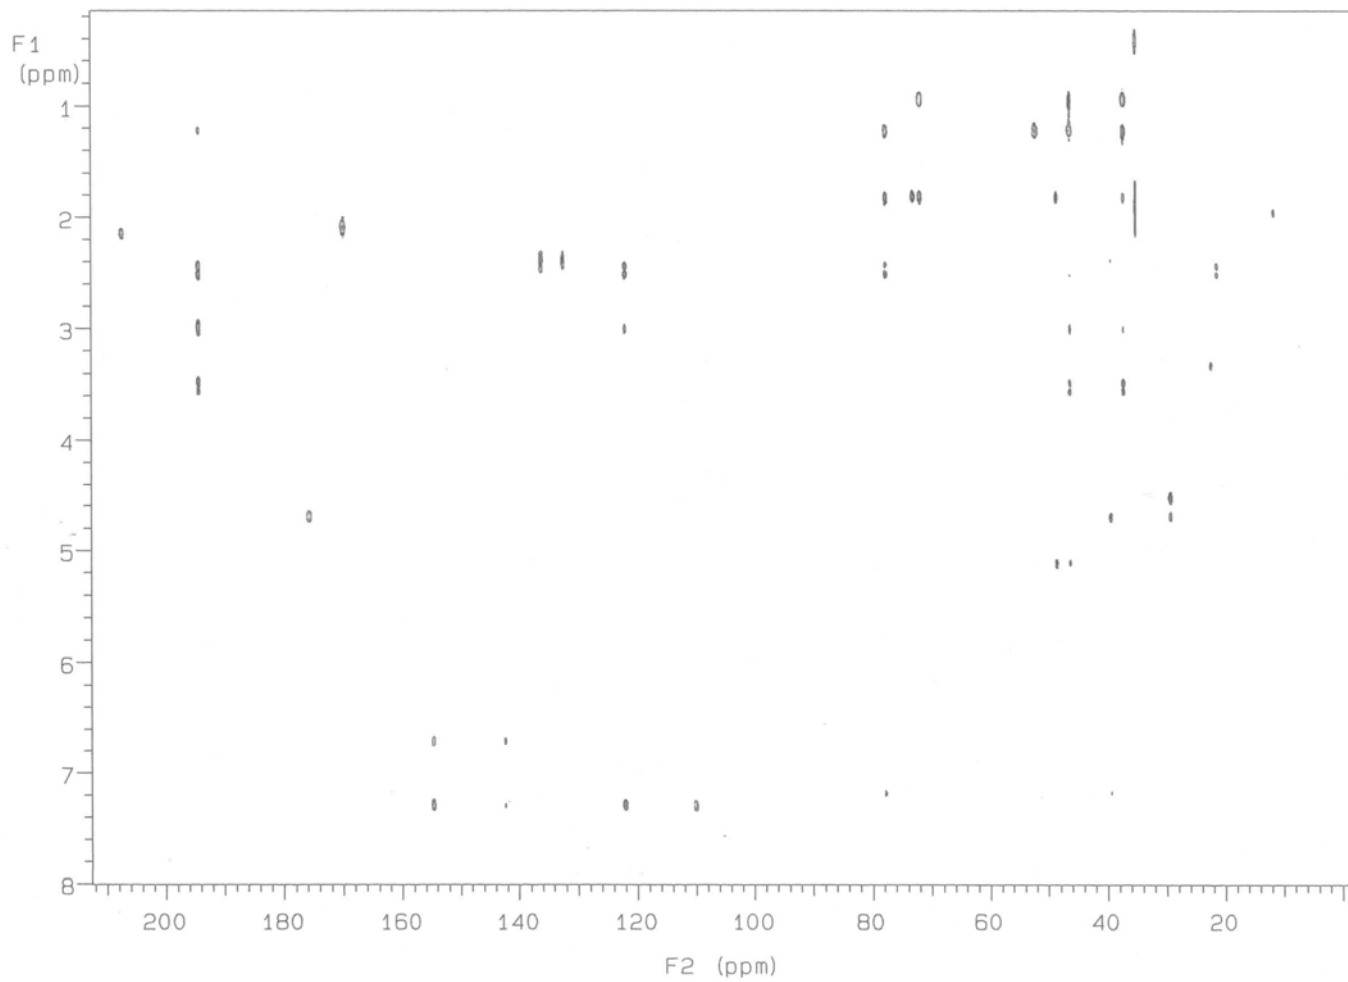

**Figure S13.** NMR FLOCK of **4b** (CDCl<sub>3</sub>)

U.N.A.M. Instituto de Quimica

300 MHz  
noesy

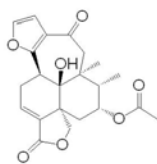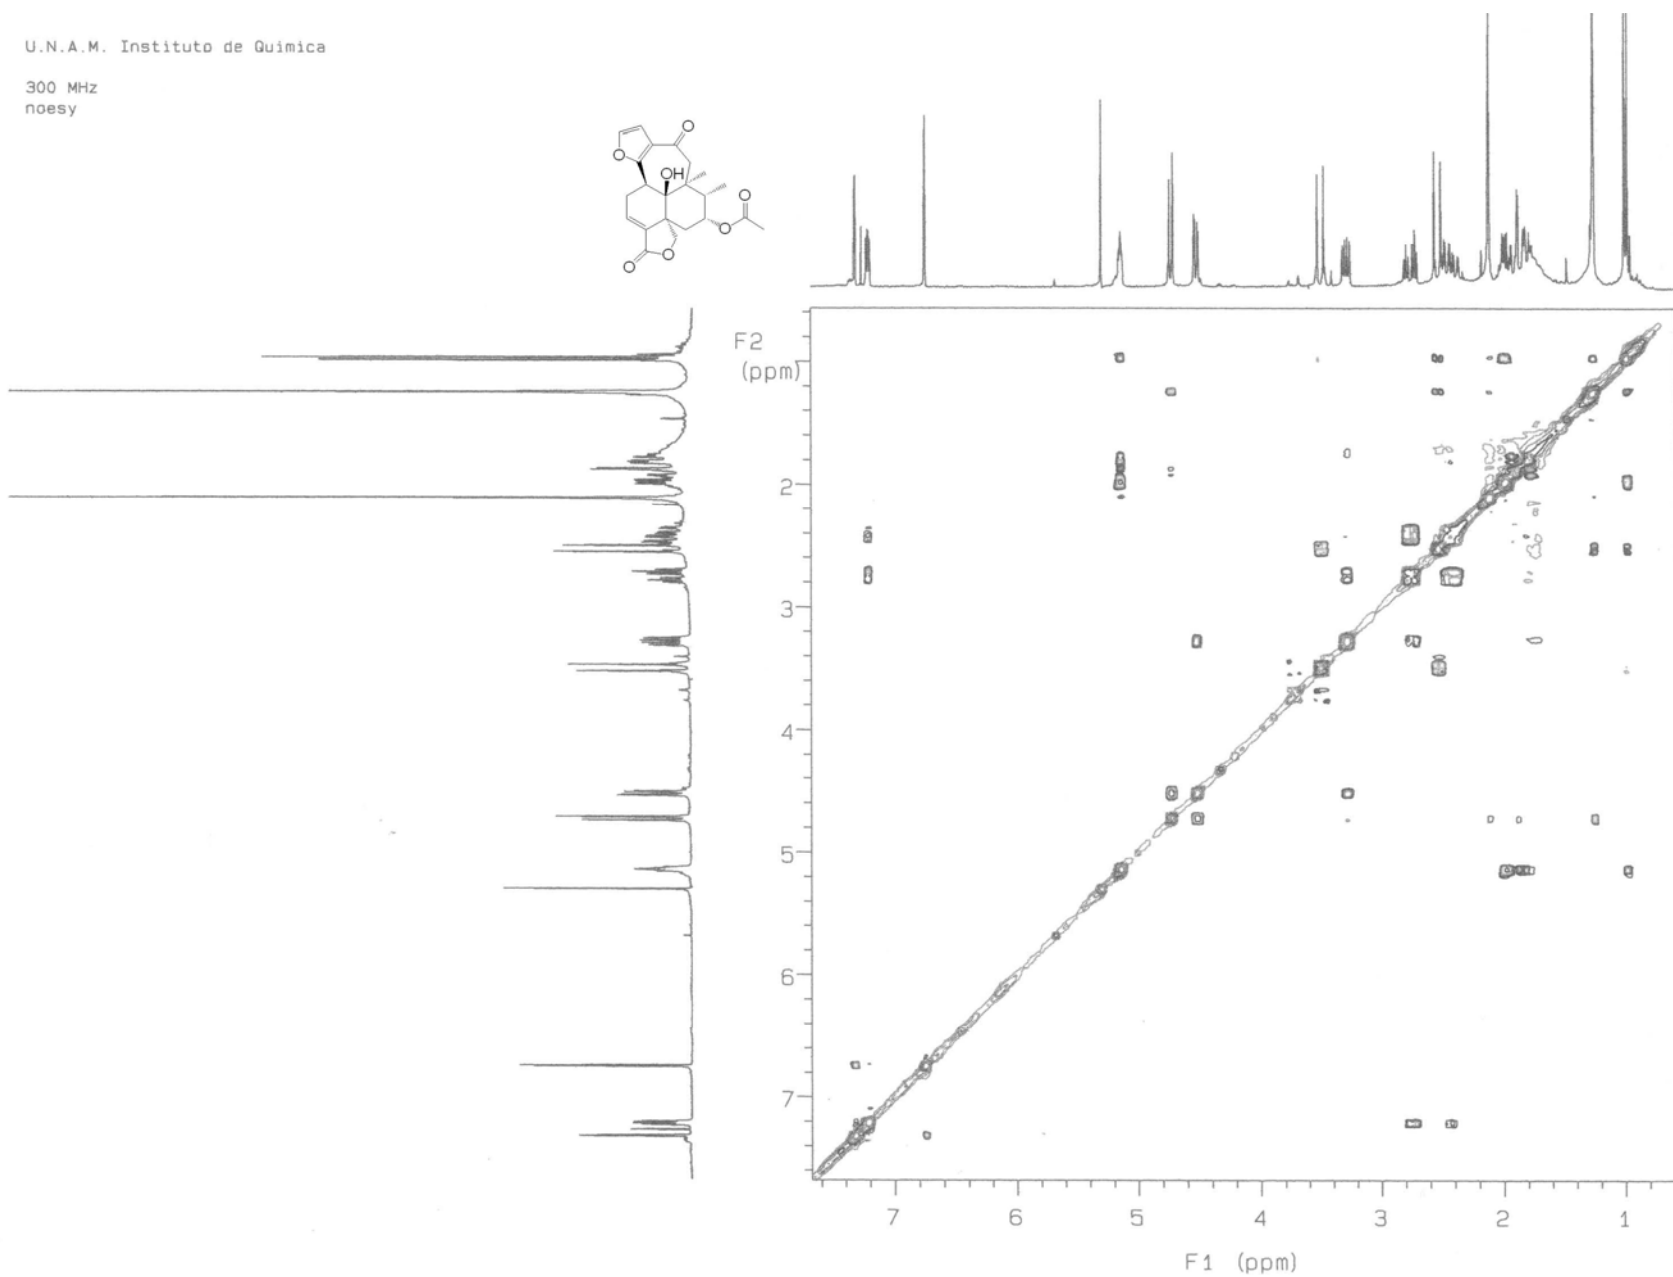

**Figure S14.**  $^1\text{H}$  NMR NOESY of **4b** ( $\text{CDCl}_3$ )
